# Supplementary material
Source: PubMed Central journal article supplement (PMC3807467)

1

## Supplemental Tables and Figures

2 Table S1. **List of primers**

3 Chromosomal sequences are in upper cases and restriction sites are underlined.

| Primers | Sequence 5'-3'                                                                 | Purpose                      |
|---------|--------------------------------------------------------------------------------|------------------------------|
| Ebm732  | GCGGATATATGCCGTGTTGTTAAAAAAGTCTTGAGTCCAGGGT <u>Gtccatggaaaagagaag</u>          | IacP_TAP                     |
| Ebm734  | ATAACAATTAATCTTATTCAATTGTTGTCAAGCGAGAGAAAAATA <u>Acataatgaatctccttag</u>       | tag                          |
| Ebm735  | <u>gaagaattc</u> ATGGCTTGACATGCAGCGTT                                          | <i>iacP</i> _TAP             |
| Ebm736  | ATCATCATATATTGCAGCCATAC                                                        | cloning                      |
| Ebm798  | GATCTTTACGCTGACACATTGGATTTAATTG                                                | IacP <sub>S38T</sub>         |
| Ebm799  | CAATTAAATCCAATGTGTCAGCGTAAAGATC                                                | mutagenesis                  |
| Ebm674  | <u>tctagaattc</u> ATGAATATGGATATTGAAGCAAGAGTC                                  | <i>iacP</i> cloning          |
| Ebm675  | <u>ttgctcagc</u> CTACACCCTGGACTCAAGAC                                          | (2H, pKO3)                   |
| Ebm773  | <u>gaagaattc</u> ATGGCGATTCTCGGCCTGGGA                                         | <i>acpS</i> cloning          |
| Ebm774  | <u>ctcctcagc</u> CTAACTTCCAGAATGACCGT                                          | (2H, pP <sub>TET</sub> )     |
| Ebm775  | <u>gaagaattc</u> ATGCTGACATCTCATTTC                                            | <i>entD</i> cloning          |
| Ebm776  | <u>ctcctcagc</u> TTATCGGGTATTGCGCTAAG                                          | (2H, pP <sub>TET</sub> )     |
| Ebm777  | <u>gaagaattc</u> ATGTACCAGGTCGTTCTGGGA                                         | <i>acpT</i> cloning          |
| Ebm778  | <u>ctcctcagc</u> TCATAGCGCTTTCGTTATCGT                                         | (2H, pP <sub>TET</sub> )     |
| Ebm779  | <u>gaagaattc</u> ATGGCGACTCACTTTGCCAGA                                         | <i>yieE</i> cloning          |
| Ebm780  | <u>ctcctcagc</u> TTATGAACGATTAAGCGTATA                                         | (2H, pP <sub>TET</sub> )     |
| Ebm904  | GGCGGTGGCTGAAATGAAACGTTTGATGCTGGAAGCGCGGCTA <u>Atcattggctggcaccagcag</u>       | P <sub>BAD</sub> <i>acps</i> |
| Ebm905  | GCGGGCAATCTCTACAATATCCGTTCCAGGCCGAGAATCGCCAT <u>Cgtttcaactccatcaaaaaaacggg</u> |                              |
| Ebm133  | <u>gaccgatcc</u> AAATCACTGGCGCGGAAG                                            | pKO3 <i>iacP</i>             |
| Ebm959  | CGAGTTTGTATAGGAAATTTAAGAGTATGAATATGGATATTGAAGCAAGAG                            |                              |
| Ebm960  | CTCTTGCTTCAATATCCATATTCATACTCTTAAATTCCTATCAAACTCG                              |                              |

4

5 Table S2. List of plasmids

| Name                            | Lab code | Description                                           | Reference           |
|---------------------------------|----------|-------------------------------------------------------|---------------------|
| pKD46                           | pEB267   | Amp <sup>R</sup> , repA101ts & oriR101                | (17)                |
| pJL72                           | pEB793   | Amp <sup>R</sup> , Kan <sup>R</sup>                   | (18)                |
| pKT25link                       | pEB354   | Kan <sup>R</sup> , p15A ori, <i>Plac</i> , T25        | (20)                |
| pT25_ACP                        | pEB375   |                                                       | (24)                |
| pT25_ACP <sub>S36T</sub>        | pEB885   |                                                       | (24)                |
| pT25_IacP                       | pJV4     |                                                       | This work           |
| pT25_AcpS                       | pJV9     |                                                       | This work           |
| pT25_EntD                       | pJV10    |                                                       | This work           |
| pT25_AcpT                       | pJV11    |                                                       | This work           |
| pT25_YieE                       | pJV12    |                                                       | This work           |
| pT25_IacP <sub>S38T</sub>       | pJV17    |                                                       | This work           |
| pUT18Clink                      | pEB355   | Amp <sup>R</sup> , colE1 ori, <i>Plac</i> , T18       | (20)                |
| pT18_ACP                        | pEB379   |                                                       | (20)                |
| pT18_ACP <sub>S36T</sub>        | pEB612   |                                                       | (20)                |
| pT18_IacP                       | pJV1     |                                                       | This work           |
| pT18_AcpS                       | pJV13    |                                                       | This work           |
| pT18_EntD                       | pJV14    |                                                       | This work           |
| pT18_AcpT                       | pJV15    |                                                       | This work           |
| pT18_YieE                       | pJV16    |                                                       | This work           |
| pT18_IacP <sub>S38T</sub>       | pJV18    |                                                       | This work           |
| pUC18_IacP_TAP                  | pJV21    | Amp <sup>R</sup> , pMB1 ori, MCS <i>lacZa</i>         | This work           |
| pUC18_IacP <sub>S38T</sub> _TAP | pJV22    |                                                       | This work           |
| pP <sub>TET</sub>               | pEB1242  | Amp <sup>R</sup> , colE1 ori, P <sub>TET</sub> , 6His | pASK-IBA37plus, IBA |
| pP <sub>TET</sub> <i>acpS</i>   | pJV37    |                                                       | This work           |
| pP <sub>TET</sub> <i>entD</i>   | pJV38    |                                                       | This work           |
| pP <sub>TET</sub> <i>acpT</i>   | pJV39    |                                                       | This work           |
| pP <sub>TET</sub> <i>yieE</i>   | pJV40    |                                                       | This work           |
| pKO3                            | pEB232   | Cm <sup>R</sup> , repA(ts) ori, M13 ori, <i>sacB</i>  | (22)                |
| pKO3 <i>acpP</i>                | pEB1334  |                                                       | (30)                |
| pKO3 <i>iacP</i>                | pEB1453  |                                                       | This work           |

6

## 7 **Figure Legends**

8 **Fig. S1: Post-translational modifications occurring on the acyl carrier protein ACP.** Components  
9 are indicated on top and designations of ACP forms are indicated at the bottom.

10 **Fig. S2: Purified IacP\_CBP and IacP<sub>S38T</sub>\_CBP** recovered using the TAP method, ran on SDS-  
11 PAGE 15% and stained with Coomassie Blue.

12 **Fig. S3: Phosphopantetheinyl transferase protein sequence alignment.** The multiple sequence  
13 alignment has been produced using ClustalW and displayed using Jalview. The consensus sequences  
14 of the PPTase enzyme family defined by Lambalot and collaborators are framed (11) and the  
15 alignment has been manually corrected in the N-terminal part to optimize their alignment.

### 16 **Fig. S4: Growth phenotypes related to AcpS depletion and complementation**

17 **A.** Growth phenotypes of the IacP\_TAP (JV48) and P<sub>BAD</sub>*acpS* IacP\_TAP (JV68) strains onto agar LB  
18 plates containing 0.2% arabinose (inducing condition of P<sub>BAD</sub>), 0.2% glucose (repressing condition  
19 of P<sub>BAD</sub>) or agar LB without any sugar addition (non-inducing condition of P<sub>BAD</sub>). **B.** Growth  
20 phenotypes of P<sub>BAD</sub>*acpS* IacP\_TAP harboring the different PPTases genes cloned into pP<sub>TET</sub>, onto agar  
21 LB plates containing 0.2% arabinose (inducing condition of P<sub>BAD</sub>) or agar LB (non-inducing  
22 condition of P<sub>BAD</sub>).

### 23 **Fig. S5 Complementation of *acpP* mutant strains**

24 **A.** The *E. coli* ACP temperature-sensitive strain (ACP<sup>ts</sup>) was transformed with the indicated  
25 plasmids used for bacterial 2-hybrid and carrying *acpP* or *iacP* coding sequences fused to the  
26 T18 fragment of adenylate cyclase. Transformants were spread on LB plates containing  
27 ampicillin and incubated at 30°C or 42°C for 3 days. Only strains able to complement the  
28 ACP temperature-sensitive phenotype could grow at 42°C. **B.** Using phage P1, the  
29  $\Delta acpP::Kan^R$  allele was transduced into *E. coli* MG1655 bearing the empty plasmid pKO3 or  
30 pKO3 carrying *acpP* or *iacP* under the control of the *acpP* promoter. Transductants were  
31 spread on LB plates containing kanamycin and grown at 30°C. Only strains able to

- 32 complement the absence of ACP could integrate the  $\Delta acpP::Kan^R$  deletion and grow on
- 33 kanamycin selective medium.



FIGURE S3

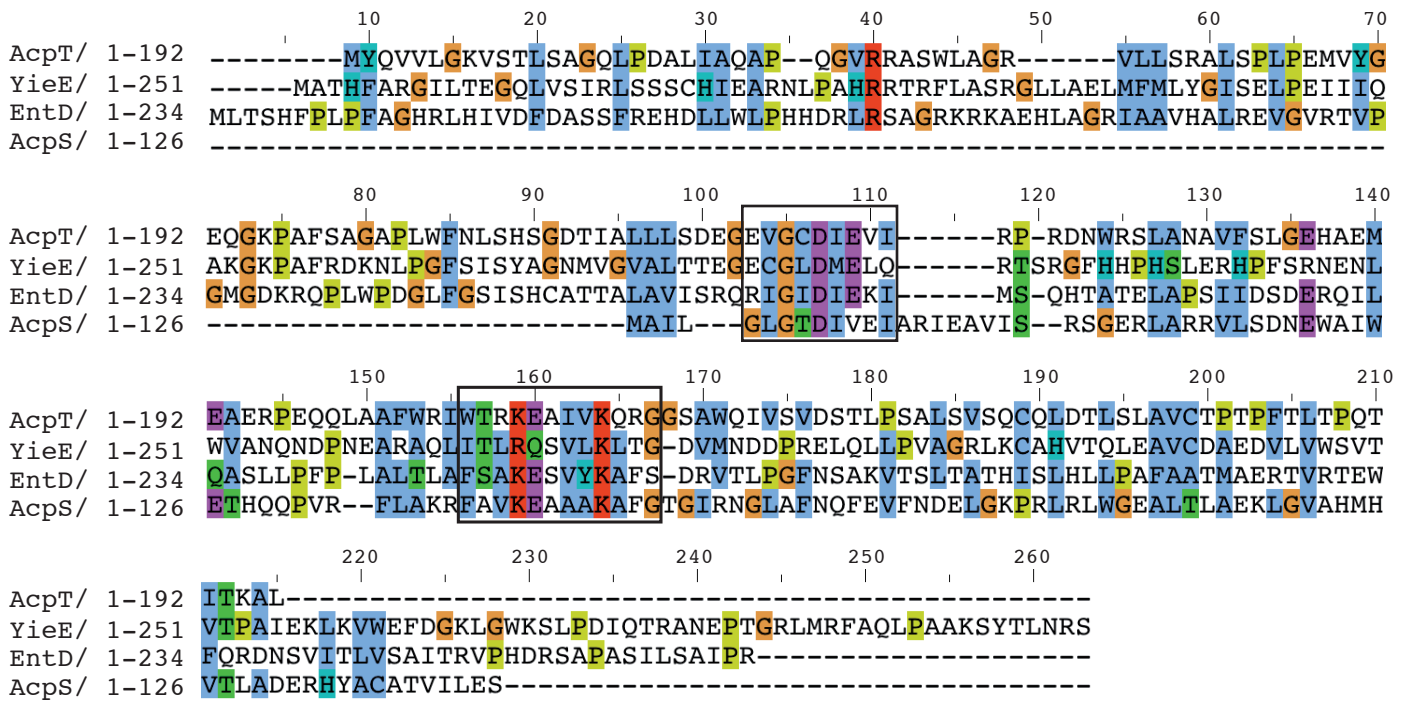

FIGURE S4

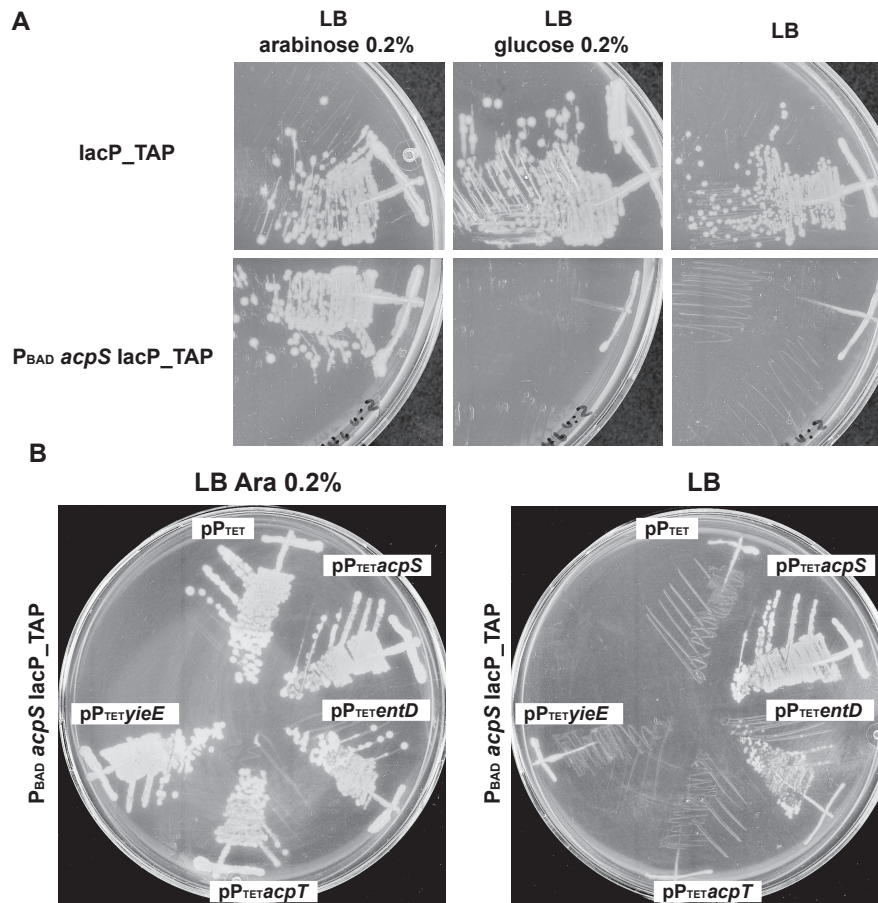

FIGURE S5

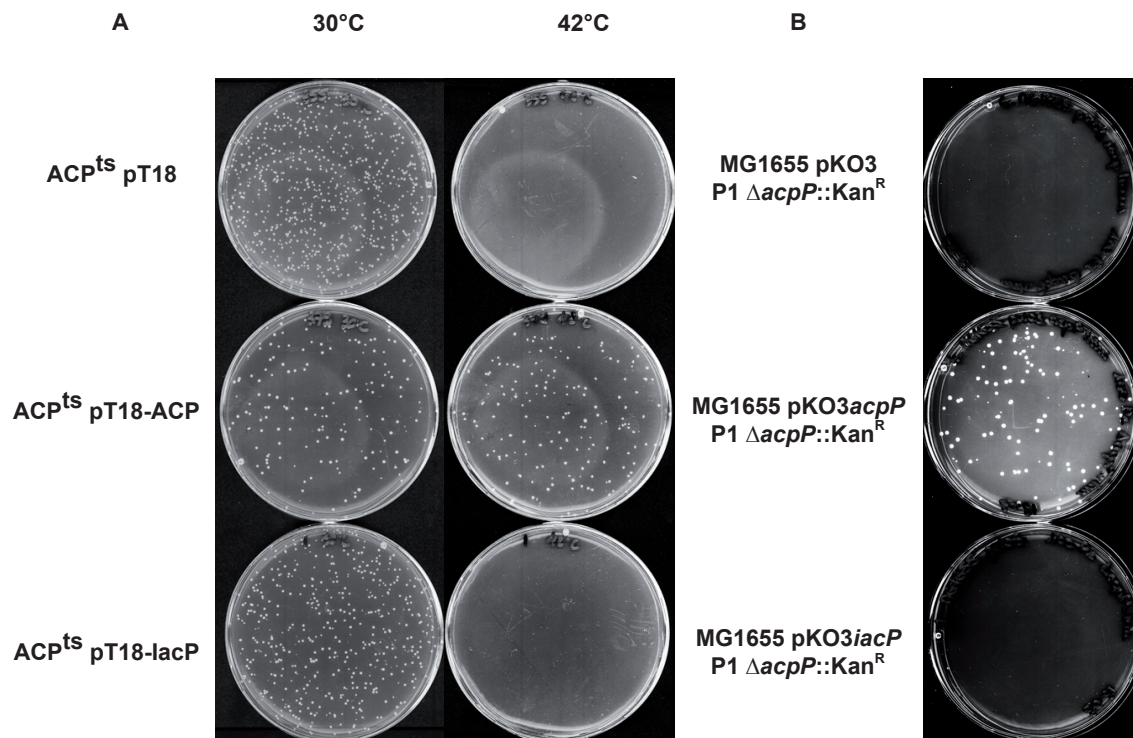

Supplement: JB.00472-13_zjb999092810so1.pdf [file JB.00472-13_zjb999092810so1.pdf]
